# DNA-based long-lived reaction-diffusion patterning in a host hydrogel

Georg Urtel, André Estevez-Torres,\* and Jean-Christophe Galas\*

1

*Sorbonne Université, CNRS, Institut de Biologie Paris-Seine (IBPS), Laboratoire Jean Perrin (LJP), F-75005, Paris*

E-mail: [andre.estevez-torres@upmc.fr](mailto:andre.estevez-torres@upmc.fr); [jean-christophe.galas@upmc.fr](mailto:jean-christophe.galas@upmc.fr)

2

## Abstract

3

4

5

6

7

8

9

10

11

12

13

14

15

16

17

18

The development of living organisms is a source of inspiration for the creation of synthetic life-like materials. Embryo development is divided into three stages that are inextricably linked: patterning, differentiation and growth. During patterning, sustained out-of-equilibrium molecular programs interpret underlying molecular cues to create well-defined concentration profiles. Implementing this patterning stage in an autonomous synthetic material is a challenge that at least requires a programmable and long-lasting out-of-equilibrium chemistry compatible with a host material. Here we show that DNA/enzyme reactions can create reaction-diffusion patterns that are extraordinary long-lasting both in solution and inside an autonomous hydrogel. The life-time and stability of these patterns - here traveling fronts and two-band patterns - are significantly increased by blocking parasitic side reactions and by dramatically reducing the diffusion coefficient of specific DNA sequences. Immersed in oil, hydrogels pattern autonomously with limited evaporation, but can also exchange chemical information from other gels when brought in contact. Our primitive metabolic

19        **material thus recapitulates two important properties of living matter: a cer-**  
20        **tain degree of autonomy that makes each piece of material an ‘individual’**  
21        **with its own metabolism and, at the same time, the capacity to interact**  
22        **with other ‘individuals’.**

## 23 **Keywords**

24 Reaction-Diffusion patterns, out-of-equilibrium system, DNA nanotechnology, metabolic ma-  
25 terials, hydrogel

## 26 Introduction

27 Living organisms have been a continuous source of inspiration for the development of new  
28 materials with diverse properties.<sup>1</sup> From wood fibers to butterfly wings, the structure of living  
29 materials has been successfully imitated in fields as diverse as construction<sup>2</sup> or optics.<sup>3</sup> In  
30 addition to its precious structural qualities, living matter is also interesting due to its highly  
31 dynamic nature. The complex and sustained network of biochemical reactions - i.e. the  
32 metabolism - that links the thousands of elements that make up a biological cell brings  
33 out surprising properties. Recently, the idea of transposing the out-of-equilibrium state  
34 of living matter into synthetic materials has emerged.<sup>4-9</sup> This unique property of living  
35 organisms would give synthetic metabolic materials the ability to self-construct, interact  
36 with the environment or reconfigure.<sup>10</sup>

37 The implementation of such metabolic materials requires a tangible and autonomous piece  
38 of matter in which programmable and out-of-equilibrium chemical reaction networks take  
39 place. Historically, a hydrogel embedded with the Belousov-Zhabotinsky (BZ) oscillating  
40 reaction that shows chemomechanical transduction in response to chemical dynamics has  
41 been the very first example of such an autonomous metabolic material, and still remains  
42 unsurpassed.<sup>11-13</sup> However, the low programmability and the harsh reaction conditions of  
43 the BZ reaction severely limit the developments of metabolic materials.

44 Providing a higher degree of programmability and biocompatibility, DNA-based molec-  
45 ular programs<sup>14-16</sup> offer an attractive alternative to build next generation metabolic mate-  
46 rials. In this regard, the pattern-forming mechanisms occurring during early embryo de-  
47 velopment,<sup>17,18</sup> are a source of inspiration in the design of metabolic materials that are  
48 capable of spatial differentiation.<sup>6</sup> Reaction-diffusion (RD) patterning is a major mechanism  
49 of chemical differentiation,<sup>19</sup> and an increasing number of RD patterns have been recently  
50 implemented with DNA-based molecular programs.<sup>6,20-26</sup> However, these programmable pat-  
51 terns have not yet been obtained inside an autonomous tangible material. One reason for  
52 this is that complex RD patterns need the underlying chemical network to be maintained

53 out-of-equilibrium, which in most cases implies using an open reactor, i.e. a reservoir that  
54 continuously replenishes the reaction with fresh chemical fuel.

55 To circumvent this problem, we take advantage of the PEN (Polymerase Exonuclease  
56 Nicking enzyme) DNA toolbox, a powerful molecular programming approach relying on  
57 short DNA oligonucleotides and enzymes, that has enabled the experimental implementa-  
58 tion of complex temporal<sup>15,27-29</sup> and spatio-temporal concentration patterns<sup>6,21,30,31</sup> in closed  
59 reactors.

60 We first significantly extend the life-time of the RD patterns - from 5 to 60 h in the  
61 current experimental conditions - by suppressing the autocatalytic formation of parasitic  
62 strands. Later, we increase the stability of two-band patterns arising from the interpretation  
63 of an underlying morphogen gradient. To do so we achieve a 35-fold reduction of the diffusion  
64 coefficient of a reactive DNA strand by co-polymerizing it with linear polyacrylamide.<sup>32</sup>

65 Finally, we embed this active solution inside a manipulable passive agarose hydrogel,  
66 thus creating an autonomous metabolic material capable of self-patterning. In particular,  
67 we obtained traveling fronts and immobile band patterns inside hydrogels immersed in oil.  
68 Notably, the hydrogels can be moved, deformed or put in contact by an external action  
69 without perturbing the patterning process.

## 70 **Results and discussion**

### 71 **A typical reaction-diffusion system for static pattern generation**

72 Among the non-trivial reaction-diffusion patterns that were implemented using the PEN  
73 DNA toolbox, the static two-band pattern generated from the reading of an underlying  
74 gradient is particularly interesting in the scope of a future metabolic material. Indeed, this  
75 out-of-equilibrium patterning is the simplest one capable of spatial differentiation, in a one-  
76 dimensional reactor.<sup>6</sup> The position of the border in between the two regions is continuously  
77 computed from the underlying molecular gradient.

78 To this end, we use a bistable network that is able to bifurcate from the production of a  
79 given DNA strand **A** to the destruction of the same strand depending on the concentration of  
80 another DNA species, the repressor **R**.<sup>33</sup> As depicted in Figure 1a and b and more detailed in  
81 Figure S1, the reaction network is based on three reactions: (i) the autocatalytic production  
82 of **A**, a 12-mer single stranded DNA (ssDNA), supported by template **T**, a 22-mer ssDNA,  
83 (ii) the repression of **A** by **R**, a 16-mer ssDNA that produces the waste **W**, a 16-mer  
84 ssDNA, and (iii) the degradation of **A** and **W**. DNA sequences are detailed in Table S1.  
85 Three enzymes are involved in the reaction: a polymerase (pol), a nicking enzyme (nick)  
86 and an exonuclease (exo). **T** and **R** are protected against degradation by the exonuclease.

87 The system is designed in a way that the repression of **A** by **R** occurs faster than the  
88 production of **A** by **T**. The concentration of **R** is a bifurcation parameter of the bistable  
89 network.<sup>15</sup> Below a given concentration of **R**, the autocatalytic production of **A** is active  
90 and the concentration of **A** in the solution increases. Above this threshold, the autocat-  
91 alytic production of **A** cannot be triggered as **A** strands are degraded into **W**, and the  
92 concentration of **A** tends to zero.

93 As depicted in Figure 1c, in the presence of an underlying gradient of **R** in a 1-dimensional  
94 reactor, a static pattern will form. Initially, the production of **A** will begin where the  
95 concentration of **R** is the lowest. A reaction-diffusion front will then propagate towards the  
96 highest **R** concentration, and it will continuously slow down until reaching the bifurcation  
97 point of the network. At this position, the front will stop, generating an out-of-equilibrium  
98 static two-band pattern.

99 This reaction network can also be used to generate a wavefront that travels at constant  
100 velocity as depicted in Figure 1d. In this case, the concentration of **R** has to be homoge-  
101 neously low. It will prevent early phase background amplification - a well known problem  
102 often simply called 'selfstart'.<sup>33,34</sup> And **A** has to be introduced on one side of the channel to

103 trigger the reaction-diffusion front.

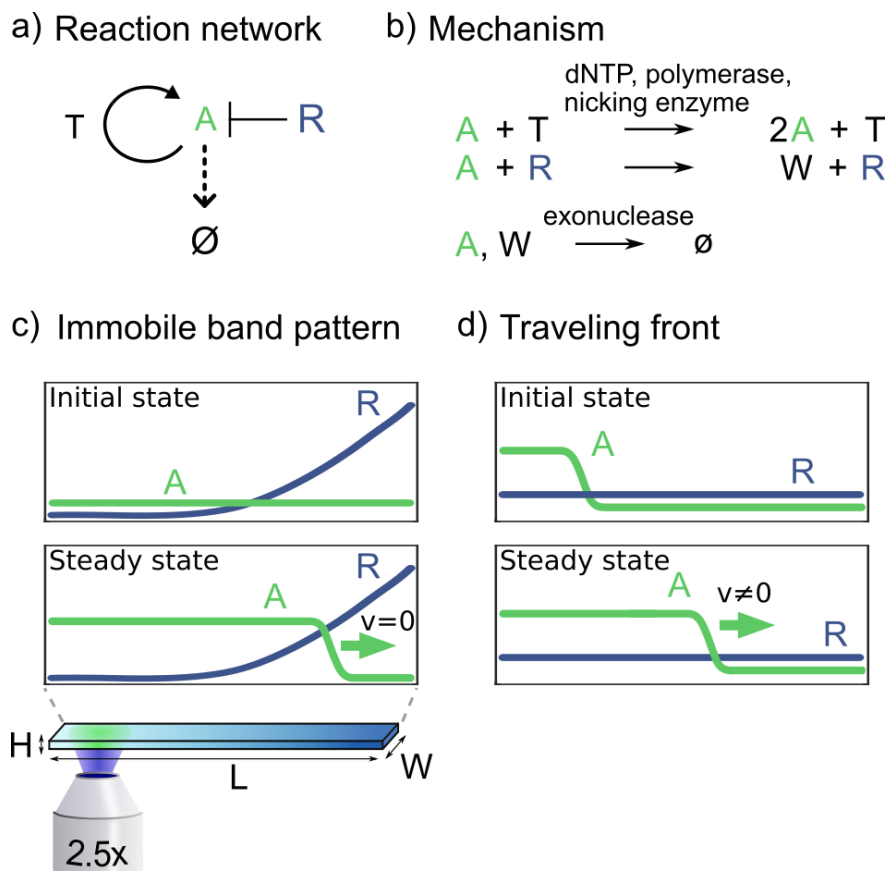

Figure 1: A bistable DNA-based reaction network generates an immobile band pattern or a traveling front. a) The bistable reaction network consists of an autocatalytic reaction of **A** supported by template **T**, a repression of **A** by **R** and a degradation of **A**. b) Details of the reactions shown in panel a. c) Scheme of a two-band pattern-formation experiment: a gradient of **R** is initially created inside a capillary. The production of **A** will then initiate where the concentration of **R** is low, thus generating a front of **A**. The front will propagate towards the higher value of **R** until it reaches the bifurcation point of the bistable system and stops, forming two chemically distinct zones (high concentration of **A**, left, low concentration of **A**, right). Experimentally, a one-dimensional system was used with the reactor length  $L$  much greater than the reactor width  $W$  and height  $H$ . d) Scheme of a traveling front experiment: when the autocatalytic production of **A** dominates over the repression of **A** by **R**, an initial excess of **A** on one side of the capillary gives rise to a traveling front that never stops.

## 104 Concentration gradients were created both in solution and inside 105 hydrogels, and observed with limited evaporation

106 A two-band pattern spatio-temporal experiment requires a gradient of repressor **R** and a  
107 homogeneous concentration of all other species. We developed a simple protocol to create  
108 a gradient of **R** by Taylor dispersion through back and forth pipetting inside a capillary.  
109 The capillary is first filled with a solution containing the DNA strands and the enzymes but  
110 not **R**. Then, the open end of the capillary is immersed in a solution containing **R**, and  
111 back and forth pipetting is performed, which results in the mixing of the two solutions by  
112 Taylor dispersion and the creation of a smooth gradient of **R** along the longitudinal axis  
113 of the capillary as shown in Figure 2a. While manual, the method is highly reproducible  
114 (Figure 2b). It can also be automated using a programmable syringe pump for convenience,  
115 but reproducibility was not significantly improved (Figure S4 and Movie S1).

116 The same protocol was used to form a tube of agarose gel with an embedded gradient. In  
117 this case, the capillary and the solutions were heated at 60°C to keep the gel liquid during the  
118 gradient preparation. At this temperature, the enzyme activity is not irreversibly affected  
119 (Figure S5). After cooling, the gel was extracted from the capillary by pushing it outwards.  
120 A 1 × 1 × 50 mm gel tube that can be easily manipulated and which contains a methylene  
121 blue dye gradient is shown Figure 2c. The reusable polydimethylsiloxane connector avoids  
122 the use of a microfluidic gel molding device and makes the method very simple.<sup>35</sup>

123 Pattern formation in our experiments occurs typically at 44°C, which induces important  
124 evaporation problems and preclude long-term experiments. In previous works, we were  
125 sealing the capillary ends with glue or grease.<sup>6,36</sup> However, the fluorescence of the glue  
126 or the grease prevented the ends of the capillaries from being imaged. In addition, this  
127 method cannot be applied to molded agarose gel. Here, we show that immersing the samples,  
128 capillaries or gels, into a pool of oil, as shown in Figure 2d, considerably limits evaporation.  
129 We measured that less than 1% of volume evaporates inside a capillary after 3 days at 44°C.  
130 Evaporation from the gel occurs through a large surface and is thus higher, we measured

131 a 14% volume contraction over 24 hours (Figures S7 and S8). Otherwise, the oil favors a  
132 homogeneous temperature, and the quality of fluorescence imaging is maintained over the  
133 entire length of the samples.

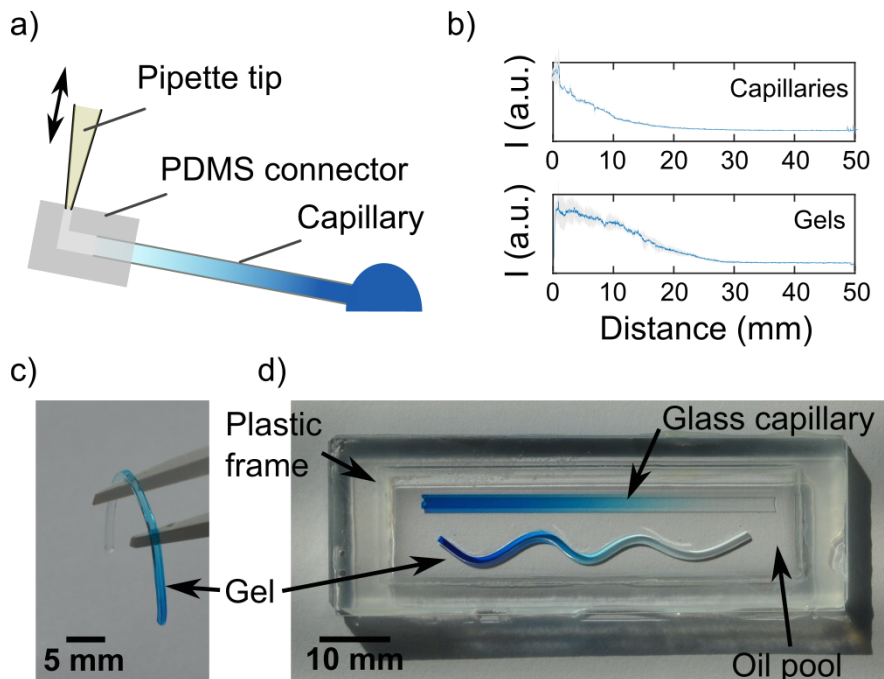

Figure 2: Centimeter-sized gradients were reproducibly generated both in an aqueous solution and in a hydrogel. a) Scheme of the gradient-generation protocol. A low concentration solution (light blue) inside a glass capillary is brought in contact with a droplet of high concentrated solution (dark blue). Subsequently, a connector is used to perform back and forth pipetting and create a gradient along the channel length through Taylor dispersion. b) Fluorescence profiles of 22-mer DNA gradients obtained inside capillaries (top panel) or gels (bottom panel). Blue lines represent the mean of 3 profiles, standard deviation appears in gray. c) A piece of agarose gel with an embedded gradient. d) Two gradients (inside a  $0.2 \times 2 \times 50$  mm glass capillary and in a  $1 \times 1 \times 50$  mm gel) immersed into a pool of mineral oil to keep the temperature constant and avoid evaporation during long experiments.

134 **Long-lived traveling fronts and band patterns were obtained by**  
135 **suppressing the formation of parasitic autocatalytic strands**

136 The PEN DNA toolbox relies on the activity of enzymes that produce or degrade the DNA  
137 strands involved in the designed reaction network. While those enzymes can keep the system  
138 out-of-equilibrium in a closed reactor by consuming dNTPs, long term experiments are dis-



139 rupted by a well known phenomena: the appearance of long strands of unwanted DNA called  
140 ‘parasite’.<sup>34,37</sup> These DNA strands of various lengths correspond to sequences synthesized  
141 de novo by the DNA polymerase. They contain the nicking enzyme recognition site and  
142 are thus exponentially amplified. They quickly saturate the active solution, consuming the  
143 chemical fuel, sequestering the enzymatic machinery and disrupting the reaction-diffusion  
144 patterns. In a recent work, we have proposed a method to prevent the formation of parasite  
145 strands, by suppressing untemplated replication in the exponential amplification reaction  
146 (EXPAR) present in PEN DNA toolbox reactions.<sup>36</sup> The method relies on specific nicking  
147 enzymes, such as Nb.BssSI, that bear only three types of nucleobases on each of the strands  
148 of the recognition site (Figure S6). In that case, fully functional replication templates can  
149 be designed using A, C, and G nucleobases only, that will produce DNA strands containing,  
150 respectively, T, G, and C nucleobases only (Figure S6). In the absence of dATP in the  
151 buffer, any emerging parasitic strand will not contain the A nucleobase. It will, therefore,  
152 not carry the nicking enzyme recognition site and will not be replicated exponentially, unlike  
153 the designed strand **A**.

154 We successfully applied this method on the network presented above for reaction-diffusion  
155 patterning. Strands **T** and **R** only contain the A, C, and G nucleobases and the reaction  
156 buffer only contains dTTP, dCTP and dGTP. The left kymographs of Figure 3a and b show a  
157 reaction-diffusion front experiment and a two-band pattern experiment in the presence of all  
158 four dNTPs. These experiments are performed in a capillary filled with an aqueous solution  
159 that contains the intercalating dye EvaGreen to monitor the dsDNA concentration over  
160 space and time (Figure S9). Experiments last for 17 hours, but after 2 hours several highly  
161 fluorescent bumps indicate the emergence of a growing parasite that disrupt the expected  
162 patterns. In contrast, in the absence of dATP, no parasitic strand production is observed  
163 and the traveling front and the two-band pattern are sustained throughout the experiment  
164 (right kymographs in Figure 3a and b and Figure S10 for concentration profiles). In the  
165 following, we will take advantage of this method to perform experiments that last for more

166 than 60 hours.

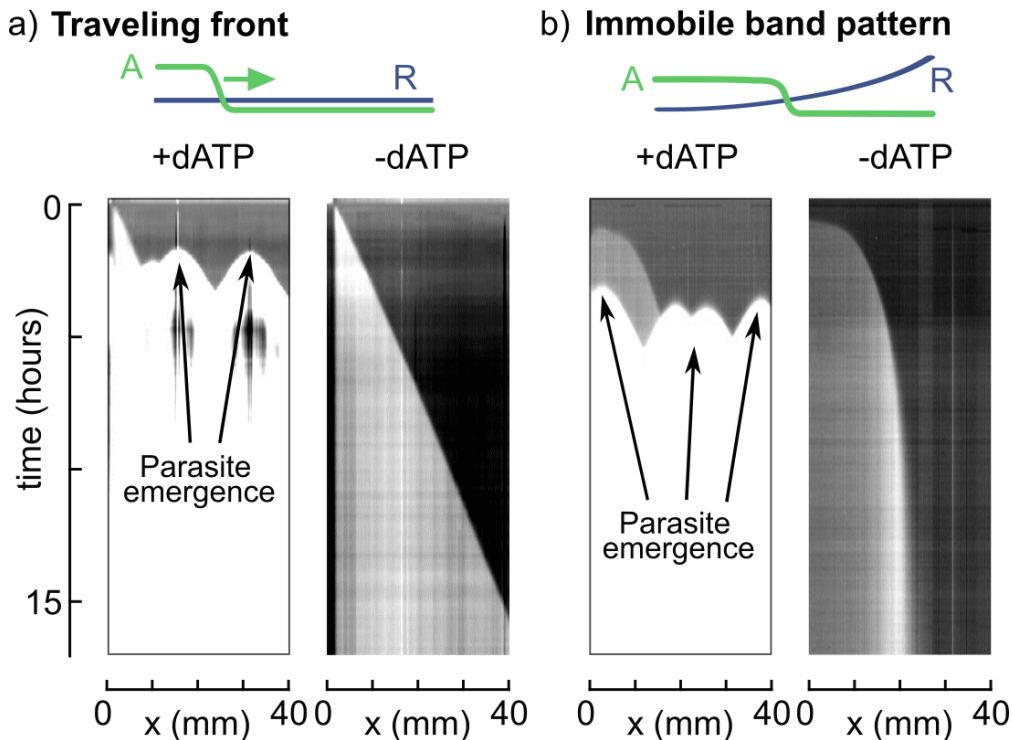

Figure 3: Parasite suppression allows long lived reaction-diffusion patterns. a) Kymographs (time vs position, fluorescence shift due to high concentration of **A**) of traveling fronts. Fronts are initiated on the left side of the capillaries and propagate with uniform velocity. In the presence of dATP (left) parasites emerge after 2 hours at different positions in the capillary. In the absence of dATP (right) parasites never emerge and the front travels through the whole capillary in 15 hours. b) Kymographs of two-band patterns. In the presence of dATP (left) parasites emerge after 5 hours at different positions in the capillary. In the absence of dATP (right) parasites never emerge, the front travels from left to right progressively decelerating until it stops, forming a two-band pattern with high concentration of **A** on the left and absence of **A** on the right. For all experiments, conditions favoring parasite emergence were used. Conditions, traveling front: 32 U/mL pol, 200 U/mL nick, 2% exo, 50 nM **T**, 50 nM **R**, and 0.4 mM dNTPs with or without dATP. Front is triggered using 0.5  $\mu$ L of 1  $\mu$ M **A**. Conditions, immobile band pattern: 32 U/mL pol, 200 U/mL nick, 2% exo, 50 nM **T**, 0-1000 nM **R**, and 0.4 mM dNTPs with or without dATP.

167 **Decoupling the dynamics of reactive species enables the preserva-**  
 168 **tion of underlying molecular information**

169 Taking advantage of the absence of parasite, the left kymograph of Figure 4a shows an  
 170 experiment that lasts for more than 60 hours. However, as it can be seen, the boundary

171 between the two regions of high and low DNA concentration is not stable over time. The  
172 front velocity over time (Figure 4a, bottom panel, blue plot) confirms this observation: it  
173 decreases to reach a constant velocity  $v = 4.5 \mu\text{m}/\text{min}$  over 20 hours before increasing after  
174 40 hours until reaching  $15 \mu\text{m}/\text{min}$ .

175 To explain the long-term destabilization of the two-band pattern, our hypothesis is that  
176 the diffusion of the underlying gradient modifies the lateral position for which the bifurcation  
177 concentration of the bistable system is reached. This concentration threshold shifts towards  
178 the right side of the capillary, making the high fluorescence region drifting to the right, which  
179 is clearly visible after 45-50 hours.

180 Indeed, considering the diffusion of  $\mathbf{R}$  over  $L = 3 \text{ mm}$  with a diffusion coefficient  $D = 170 \mu\text{m}^2/\text{s}$ ,  
181  $\mathbf{R}$  will diffuse with a characteristic time  $\tau_D = L^2/2D \approx 14 \text{ h}$ . This means that the gradient  
182 of  $\mathbf{R}$  will significantly flatten during long lasting experiment, potentially compromising the  
183 stability of the band pattern (Figure S11).

184 Numerical simulations of a simple model (Supporting Information section 10) accounting  
185 for the autocatalytic production of  $\mathbf{A}$  over template  $\mathbf{T}$ , the repression of  $\mathbf{A}$  by  $\mathbf{R}$ , the  
186 degradation reactions and the diffusion of the underlying  $\mathbf{R}$  gradient qualitatively catches  
187 this phenomenon (Figure 4a).

188 To stabilize the two-band pattern at longer times, we decided to immobilize, or drastically  
189 reduce the diffusion of  $\mathbf{R}$  in order to impede the underlying gradient to flatten. Surface  
190 attachment is a possible strategy. Yet it is difficult to obtain a pattern showing a clean  
191 gradient over several centimeters.<sup>38</sup> Moreover, the distribution of the DNA in the solution  
192 is not homogeneous, which may disrupt the performance of the reaction network.

193 We chose an alternative strategy by copolymerizing the DNA repressor into a long poly-  
194 mer chain. In particular, a DNA strand modified at its 5' end by an acrylic phosphoramidite  
195 was incorporated into a linear polyacrylamide (LPA) chain during the free radical polymer-  
196 ization, thus forming a poly(acrylamide-co-DNA).<sup>32,39</sup>

197 The purification of the solution - in particular to remove the non-attached DNA or the

198 DNA attached to short LPA chains - was carried out by electroelution. We used size-exclusion  
199 chromatography to estimate the weight distribution of the LPA-DNA conjugate, and found  
200 a molecular weight in the range 0.3-2 MDa (Supporting Information section 8).

201 Fluorescence Recovery After Photobleaching (FRAP) experiments were performed to de-  
202 termine the diffusion coefficient of the LPA-DNA conjugate at 44°C. We found  $D = 4.8 \pm 2 \mu\text{m}^2/\text{s}$ ,  
203 which is 35 times less than the free diffusing DNA ( $D = 170 \pm 42 \mu\text{m}^2/\text{s}$ ) (Figure S13).  
204 Inside an agarose gel matrix, the diffusion of the LPA-DNA conjugate is even smaller,  
205  $D = 2 \pm 1 \mu\text{m}^2/\text{s}$ .

206 Panel b in Figure 4 shows an experiment where a copolymer of **R** with LPA, **LPA-R**,  
207 was used to make the gradient of repressor. In this case, the band pattern is stable for more  
208 than 60 hours. The front velocity (Figure 4b, bottom panel), after an initial decrease due to  
209 the pattern formation remains constant and close to zero ( $v = 1.5 \mu\text{m}/\text{min}$ , to be compared  
210 with the traveling front velocity  $v = 40 \mu\text{m}/\text{min}$  shown in Figure 3). Simulations by only  
211 changing the diffusion coefficient of **R** to that of **LPA-R** are in agreement with this result  
212 (Figure 4b).

213 These experiments demonstrate that an individual control of diffusion for each species  
214 can be achieved. It is thus possible to implement reaction-diffusion mechanisms in the  
215 presence of an underlying molecular information that is stable over a long period of time.  
216 It recapitulates a key feature of living materials: they are not only hierarchically assembled  
217 from a structural point of view, but also from a dynamic point of view. A well-know example  
218 is the conceptual French flag model coming from developmental biology, where an immobile  
219 concentration gradient provides positional information and supports the formation of a band  
220 pattern of concentration.<sup>40</sup>

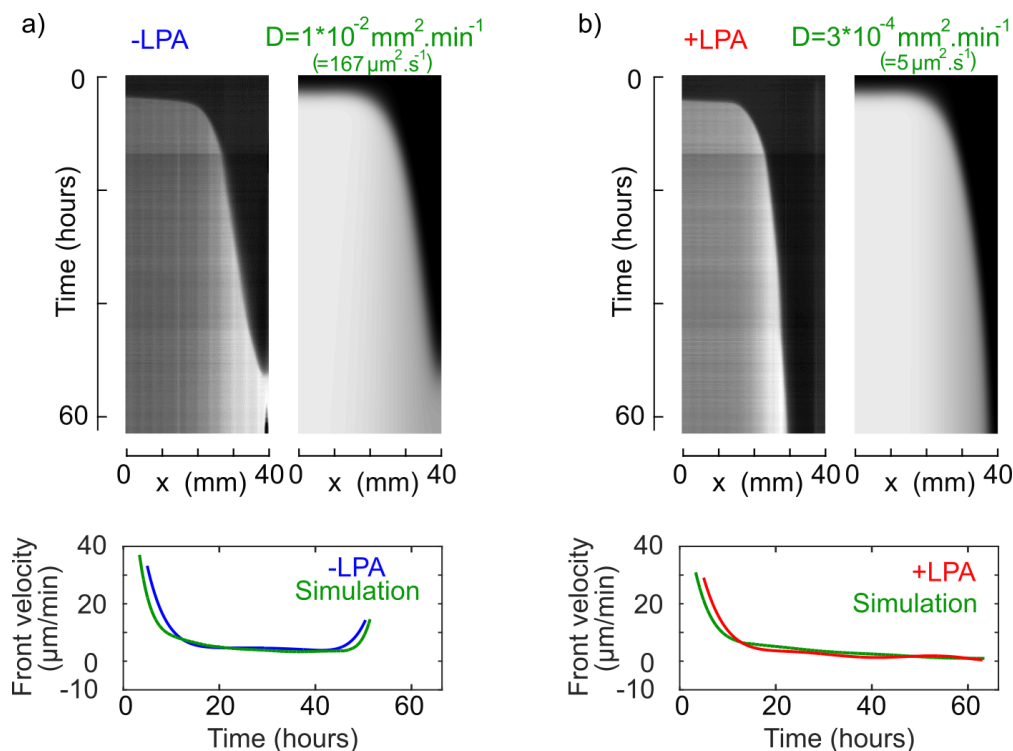

Figure 4: Long-term stability of the final pattern is significantly increased by a slowly diffusing underlying cue. a) Top: experimental and simulated kymographs (time vs position, fluorescence shift due to **A** strand) of a two-band pattern experiment in the presence of a gradient of repressor **R** that freely diffuses. The pattern forms and disappears as the out-of-equilibrium molecular program interprets a continuously changing gradient cue. Bottom: front velocities over time. b) Top: experimental and simulated kymographs of a two-band pattern experiment in the presence of a gradient of repressor attached to linear polyacrylamide (**LPA-R**, diffusing 35 times less). The pattern is stable for more than 60 hours. Bottom: front velocities over time. Experimental conditions: 8 U/mL pol, 200 U/mL nick, 2% exo, 50 nM **T**, 0-750 nM **R**, and 0.4 mM dNTPs. Simulation parameters are detailed in the Supporting Information section 10.

221 **Autonomous self-patterning hydrogels that are capable of exchanging**  
 222 **chemical information**

223 In the above, the designed active solutions were able to perform non-equilibrium spatio-  
 224 temporal computations that generated non-trivial concentration patterns in a sealed reactor.  
 225 Despite their interest, these computations did not occur inside a tangible piece of matter  
 226 and they were not able to exchange chemical information with the outside world, two crucial

227 properties of non-equilibrium computations in living systems. In the following, we seek to  
228 obtain metabolic materials that are simple yet combine a certain degree of autonomy with  
229 the capacity of interacting with other materials, as living systems do. In particular, we  
230 show that hydrogels embedded with DNA/enzyme active solutions are at the same time  
231 autonomous and can interact with each other.

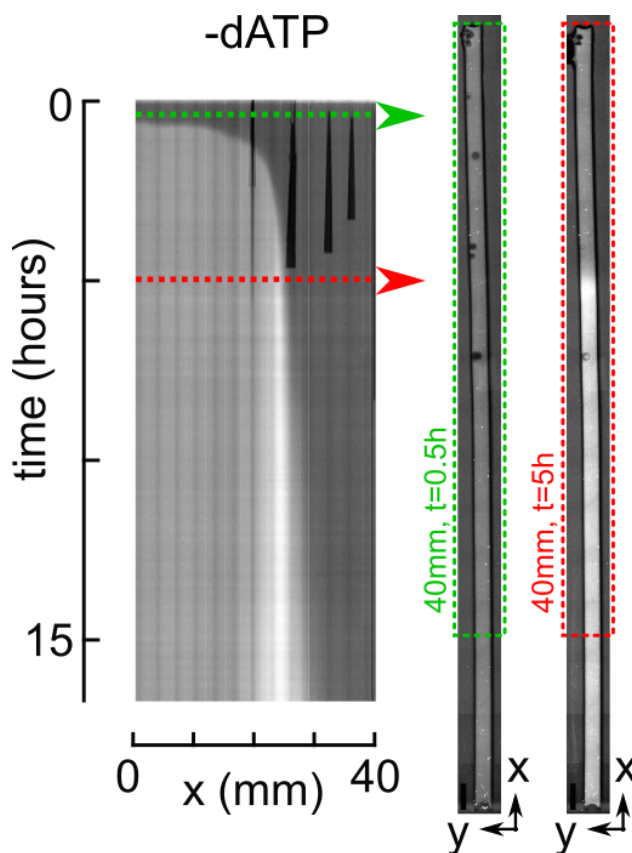

Figure 5: Reaction-diffusion patterning inside an autonomous hydrogel. Kymograph of the fluorescence shift due the concentration of strand **A** *vs.* time and position inside a rectangular block of gel submerged in oil. Vertical dark lines visible on top of the kymograph are air bubbles in the oil introduced when the gel was poured into the oil pool. On the right are shown fluorescent images of the full gel at  $t = 0.5$  h and  $t = 5$  h, imaged from the bottom. The block of gel is  $1 \times 1 \times 50$  mm<sup>3</sup>. Experimental conditions: 44°C, 32 U/mL pol, 200 U/mL nick, 1% exo, 50 nM **T**, 0-1000 nM **R**, and 0.4 mM dNTPs.

232 First, we tested whether DNA/enzyme solutions were still active and capable of au-  
233 tonomous patterning inside a hydrogel. The hydrogel was submerged in oil to limit evapora-  
234 tion and provide an environment where hydrogels could be isolated and possibly also interact

235 with each other (see below). Following the protocol described in Figure 2, we prepared an  
236 agarose rectangular block, with dimensions  $1 \times 1 \times 50$  mm, that contained a homogeneous  
237 mixture of ssDNAs **T** and **A** and of the three enzymes, and a concentration gradient of  
238 repressor strand **R** along the long axis of the hydrogel block. We obtained a piece of gel  
239 that, as expected, could be easily manipulated and deformed inside the oil pool as shown  
240 in Figure 2d. However, to facilitate image acquisition the gel was aligned as straight as  
241 possible. Figure 5 shows that a gel containing such an active solution was able to create  
242 the expected two-band reaction-diffusion pattern. If we compare it with the experiment  
243 performed in solution in similar conditions (Figure 3), the patterns look alike. In both cases  
244 dsDNA fluorescence appears at  $\sim 40$  min and the two-band pattern is stable for at least 10 h.  
245 However, the pattern stabilizes faster in the gel (after 5 h) than it does in solution (after  
246 8 h), possibly because the gradient of **R** was sharper in the gel. Importantly, the activity  
247 of the enzymes is not degraded during the fabrication of the self-patterning hydrogel that  
248 takes place at  $60^\circ\text{C}$  (Figure S5). Finally, the parasite-suppression strategy in the absence of  
249 dATP is again fully functional.



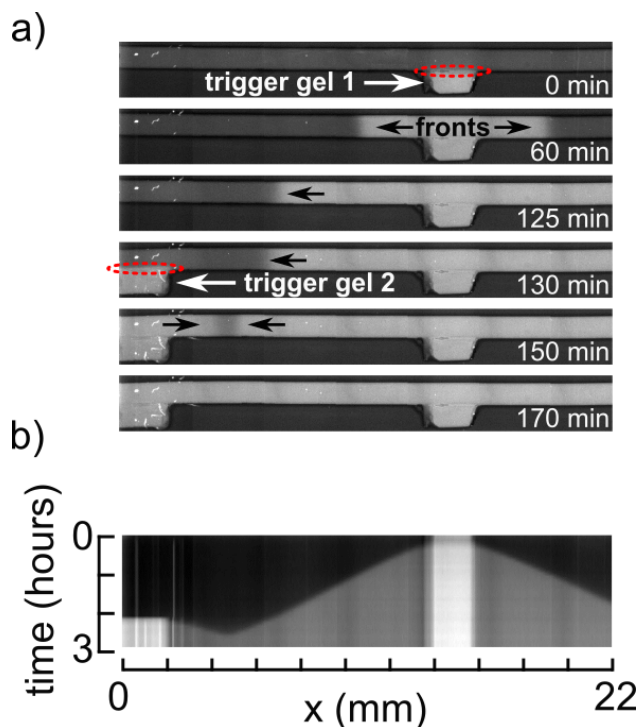

Figure 6: Autonomous hydrogels exchange chemical information when brought into contact. Time-lapse fluorescent images (a) and kymograph of the fluorescence shift due the concentration of strand **A** *vs.* time and position (b) showing the propagation of fronts triggered at different times (after 0 and 130 minutes) and positions through the contact (red dashed line circles) of small pieces of gel containing 100 nM of trigger **A**. Experimental conditions: 44°C, 32 U/mL pol, 200 U/mL nick, 1% exo, 50 nM **T**, 20 nM **R**, 0.4 mM dNTPs and an addition of 100 nM **A** for the trigger gels.

250 Second, we tested whether isolated pieces of active hydrogel could interact with each  
251 other and transfer chemical information. To do so, we fabricated three pieces of gel. One  
252 piece was a 25 mm-long rectangular block embedded with an active solution programmed  
253 to sustain a traveling wavefront but not to trigger it in the absence of an external stimulus  
254 (homogeneous concentrations of **T**, **R** and enzymes, but no **A**). The other two pieces were  
255 2 mm-long agarose blocks containing the same solution supplemented with 100 nM **A**, and  
256 thus capable of triggering a traveling front of **A**. The three pieces were submerged in oil  
257 and separated from one another. At  $t = 0$  min we brought into contact one small piece  
258 with the long block, and observed that a traveling front was triggered inside the long block  
259 (Figure 6). Later, at  $t = 130$  min, the second small piece of gel was put in contact with the



260 long block at a different position, triggering a new front. As expected, all fronts propagate  
261 at the same velocity and the two fronts that traveled in opposite directions annihilated at  
262 collision.<sup>30</sup> Importantly, the oil environment allowed to isolate the hydrogels when they were  
263 not in contact and to couple them when they touched each other.

264 Taking together, these experiments show that an isolated metabolic material made of  
265 a hydrogel embedded with a DNA/enzyme active solution can sustain non-trivial out-of-  
266 equilibrium spatio-temporal computations over tens of hours without external input. More-  
267 over, physical contact between different pieces of the metabolic material triggers the transfer  
268 of chemical information by diffusion. Our primitive metabolic material thus recapitulates  
269 two important properties of living matter: a certain degree of autonomy that makes each  
270 piece of material an ‘individual’ with its own metabolism and, at the same time, the capacity  
271 to interact with other ‘individuals’.

## 272 Conclusion

273 Among the biomimetic materials under development, metabolic materials that combine a  
274 programmable out-of-equilibrium chemical solution coupled to a chemically responsive ma-  
275 terial, are becoming increasingly important.<sup>10</sup> They seek to mimic what gives life its unique  
276 character: a sustained dynamic state, which offers self-construction and self-reconfiguration  
277 capabilities and allows constant interaction with the environment.

278 We took advantage of DNA/enzyme reactions to mimic key features of living systems that  
279 we would like to see incorporated into synthetic metabolic materials. To do so we solved three  
280 important limitations: (i) long-term sustainability of a well defined non-equilibrium state,  
281 (ii) dynamic heterogeneity of reaction network components in solution and (iii) autonomy  
282 and communication capability inside a tangible material.

283 Regarding the long term sustainability, the main two issues were the production of par-  
284 asitic autocatalytic strands that saturate the samples and the diffusion of the underlying

285 molecular gradient that disrupts the static reaction-diffusion patterns.

286 By using a particular nicking enzyme that contains only three types of nucleobases at  
287 the bottom strand of the restriction site (Nb.BssSI), and by limiting the dNTPs solution to  
288 dTTP, dCTP and dGTP, the formation of parasitic autocatalytic strands was thus impos-  
289 sible. Only voluntarily introduced templates that contain the A nucleobase necessary for  
290 nicking were able to generate exponential growth. Otherwise, to maintain underlying spatial  
291 molecular information over long time scales, we copolymerized a specific DNA strand with  
292 a long inert polymer to create a reactive species with very limited diffusion. As a result, 60  
293 hour-long out-of-equilibrium patterns were obtained.

294 Finally, we embedded our active solution in a host hydrogel to get a tangible, soft and  
295 shapable autonomous metabolic material that supports non-trivial pattern formation. In-  
296 teraction between gels of different compositions was demonstrated. Considering a bistable  
297 reaction network, we generated an out-of-equilibrium two-band pattern by reading an immo-  
298 bile underlying gradient of DNA prepared using a simple but robust experimental protocol.  
299 From a shallow gradient, the 50 mm long gel splits into two chemically distinct zones that  
300 could be used in the future to define the material fate.

301 The strategy demonstrated here is thus a great opportunity to explore in the near future  
302 chemomechanical transduction in a programmable metabolic material by using currently ex-  
303 isting DNA-based chemomechanical transduction schemes.<sup>41,42</sup> It provides key developments  
304 towards autonomous metabolic materials that could imitate in an ever more faithful way the  
305 extraordinary properties of living matter.

## 306 **Methods**

307 *DNA solutions* - Oligonucleotides were purchased from IDT or biomers.net (Sequences are  
308 displayed Table S1). The enzymes we used were 8-32 U/mL Bst DNA Polymerase, Large  
309 Fragment (NEB), 200 U/ml Nb.BssSI (NEB) and in-house produced *thermus thermophilus*

310 RecJ exonuclease.<sup>43</sup> 1% exonuclease corresponds to a degradation rate of 22 nM/min for a  
311 15-mer ssDNA at 44°C. The reaction buffer contained 20 mM Tris-HCl, 10 mM (NH<sub>4</sub>)<sub>2</sub>SO<sub>4</sub>,  
312 50 mM NaCl, 1 mM KCl, 2 mM MgSO<sub>4</sub>, 6 mM MgCl<sub>2</sub>, 1 g/L synperonic F 108 (Sigma-  
313 Aldrich), 4 mM dithiothreitol, 0.1 g/L BSA (NEB) and 1x EvaGreen Dye (Biotium). De-  
314 oxynucleotide triphosphates were purchased from NEB or Invitrogen and added in differ-  
315 ent concentrations, as specified. Kinetic characterisation experiments were performed in a  
316 CFX96 Touch Real-Time PCR Detection System (Bio-Rad) or a Qiagen Rotor-Gene qPCR  
317 machine. Epifluorescence microscopy was used for spatio-temporal experiments.

318 *DNA-LPA synthesis* - To synthesize the DNA-linear polyacrylamide (LPA) copolymer, we  
319 purchased DNA with a 5'-acrydite modification. Monomeric acrylamide (20% w/w, Sigma-  
320 Aldrich), tetramethylethylenediamine (0.12% w/v TEMED, Sigma-Aldrich) and ammonium  
321 persulfate (0.12% w/v APS, Sigma-Aldrich) were used to polymerize linear acrylamide in  
322 the presence of 30 μM acrydite-modified DNA, thus producing poly(acrylamide-co-DNA).  
323 Unreacted acrydite strands or strands with only small LPA attachments were removed by  
324 electroelution. For electroelution, we used a lab-built device, with a 5 mm wide central  
325 chamber that is sandwiched between two porous membranes with 0.22 μm diameter holes.  
326 98 μL of the LPA-DNA solution was mixed with 2 μL 50×TAE buffer and filled into the  
327 chamber. Each membrane separate the chamber from a tank containing 3.5 mL 1×TAE  
328 buffer. We put an electrode into each tank and ran a current of 3 mA, resulting in a voltage  
329 of approximately 50-80 V, for 10 minutes. We then recovered the sample from the central  
330 chamber. Fluorescence Recovery After Photobleaching (FRAP) and FFT image analysis  
331 using Matlab were used to extract the diffusion coefficient of the DNA-LPA.

332 *Experiment setup and gradient preparation* - To create a gradient of DNA strand **R** in a  
333 homogeneous solution of all other species, two solutions were prepared, one with **R** and the  
334 other without. Both solutions contained the buffer, the enzymes and the rest of the DNA  
335 species. A 0.2 × 2 × 50 mm rectangular glass capillary (Vitrocom), inserted in a PDMS  
336 connector (as depicted in Figure 2), was first filled with the solution containing no **R**. Then,

337 the end of the capillary was dipped into the reaction solution containing **R**. Micropipette up-  
338 and-down pumps of 5 to 10  $\mu\text{L}$  were performed to create the gradient by Taylor dispersion.  
339 After 10 to 20 back and forth pumps the gradient was formed, the connector removed and the  
340 capillary was then dropped into a pool of mineral oil (Sigma) made by a plastic frame stuck  
341 on a glass slide. The same protocol was used to mold low gelling agarose (Sigma A9539, low  
342 EEO) with embedded DNA/enzyme solutions. It has to be performed between 50°C and  
343 70°C to get liquid agarose and avoid enzyme degradation.  $1 \times 1 \times 50$  mm capillaries were  
344 used to finally get pieces of gel that can be easily handled by hand. Once prepared, the gel  
345 was cooled down in the fridge and extracted from the capillary by pushing it outwards with  
346 a suitable piston. Again, the piece of agarose was dropped into a pool of mineral oil to avoid  
347 evaporation. The temperature of the samples, capillaries or gels immersed in the oil pool,  
348 was controlled with a Tokai Hit heating stage set at 44°C.

349 *Microscopy imaging* - DNA concentration over space and time was measured by fluores-  
350 cence. A Zeiss Axio Observer Z1 fully automated epifluorescence microscope controlled with  
351 MicroManager 1.4 was used. Contiguous fluorescence images (green channel) were recorded  
352 automatically every 1 to 20 minutes to get an entire view of the capillaries or gels after  
353 stitching. Kymographs were obtained by averaging the fluorescence images over the width  
354 of the capillary or the gel and then stacking these profiles over time.

355 More details can be found in the supplementary materials.

## 356 **Supporting Information Available**

357 The supplementary data contains DNA sequences, method for gradient generation, protocol  
358 to synthesize DNA attached to LPA, characterization of DNA-LPA strand, and supplemen-  
359 tary experiments associated to Figures 3, 4, 5 and 6.

## Acknowledgement

A. Shoushtarizadeh for preliminary experiments on gradient generation. G. McCallum for work on simulations. E. Edeleva, A. Senoussi, M. Van Der Hofstadt, Y. Rondelez and G. Ginés for insightful discussions and comments.

## Funding

This work has been funded by the European Research Council (ERC) under the European's Union Horizon 2020 programme (grant No 770940, A.E.-T.), by the Deutsche Forschungsgemeinschaft (DFG, G.U.) and by the Ville de Paris Emergences programme (Morphoart, A.E.-T.)

## References

- (1) Fratzl, P. Biomimetic materials research: what can we really learn from nature's structural materials? *Journal of the Royal Society, Interface* **2007**, *4*, 1742–5662.
- (2) Wegst, U. G. K.; Bai, H.; Saiz, E.; Tomsia, A. P.; Ritchie, R. O. Bioinspired structural materials. *Nature Materials* **2014**, *14*, 23 EP –, Review Article.
- (3) Niu, S.; Li, B.; Mu, Z.; Yang, M.; Zhang, J.; Han, Z.; Ren, L. Excellent Structure-Based Multifunction of Morpho Butterfly Wings: A Review. *Journal of Bionic Engineering* **2015**, *12*, 170 – 189.
- (4) Boekhoven, J.; Hendriksen, W. E.; Koper, G. J. M.; Eelkema, R.; van Esch, J. H. Transient assembly of active materials fueled by a chemical reaction. *Science* **2015**, *349*, 1075–1079.
- (5) Needleman, D.; Dogic, Z. Active matter at the interface between materials science and cell biology. *Nature Reviews Materials* **2017**, *2*, 17048 EP –, Review Article.

- 382 (6) Zadorin, A. S.; Rondelez, Y.; Gines, G.; Dilhas, V.; Urtel, G.; Zambrano, A.;  
383 Galas, J. C.; Estevez-Torres, A. Synthesis and materialization of a reaction-diffusion  
384 French flag pattern. *Nature Chemistry* **2017**, *9*, 990–996.
- 385 (7) Merindol, R.; Walther, A. Materials learning from life: concepts for active, adaptive  
386 and autonomous molecular systems. *Chem. Soc. Rev.* **2017**, *46*, 5588–5619.
- 387 (8) Tang, T.-Y. D.; Cecchi, D.; Fracasso, G.; Accardi, D.; Coutable-Pennarun, A.;  
388 Mansy, S. S.; Perriman, A. W.; Anderson, J. L. R.; Mann, S. Gene-Mediated Chemical  
389 Communication in Synthetic Protocell Communities. *ACS Synthetic Biology* **2018**, *7*,  
390 339–346.
- 391 (9) Beneyton, T.; Krafft, D.; Bednarz, C.; Kleineberg, C.; Woelfer, C.; Ivanov, I.;  
392 Vidakovic-Koch, T.; Sundmacher, K.; Baret, J.-C. Out-of-equilibrium microcompart-  
393 ments for the bottom-up integration of metabolic functions. *Nature Communications*  
394 **2018**, *9*, 2391.
- 395 (10) Ross, J. L. Autonomous materials from biomimicry. *MRS Bulletin* **2019**, *44*, 119–123.
- 396 (11) Yoshida, R.; Ichijo, H.; Hakuta, T.; Yamaguchi, T. Self-oscillating swelling and  
397 deswelling of polymer gels. *Macromolecular Rapid Communications* **1995**, *16*, 305–310.
- 398 (12) Yoshida, R.; Ueki, T. Evolution of self-oscillating polymer gels as autonomous polymer  
399 systems. *Npg Asia Materials* **2014**, *6*, e107 EP –, Review.
- 400 (13) Shiraki, Y.; Yoshida, R. Autonomous Intestine-Like Motion of Tubular Self-Oscillating  
401 Gel. *Angewandte Chemie International Edition* *51*, 6112–6116.
- 402 (14) Kim, J.; White, K. S.; Winfree, E. Construction of an in vitro bistable circuit  
403 from synthetic transcriptional switches. *Molecular systems biology* **2006**, *2*, 68–68,  
404 17170763[pmid].

- 405 (15) Montagne, K.; Plasson, R.; Sakai, Y.; Fujii, T.; Rondelez, Y. Programming an in vitro  
406 DNA oscillator using a molecular networking strategy. *Molecular Systems Biology* **2011**,  
407 7.
- 408 (16) Zhang, D. Y.; Seelig, G. Dynamic DNA nanotechnology using strand-displacement  
409 reactions. *Nature Chemistry* **2011**, 3, 103 EP –, Review Article.
- 410 (17) Wolpert, L. *Principles of Development*; Oxford University Press, 2015.
- 411 (18) Briscoe, J.; Small, S. Morphogen rules: design principles of gradient-mediated embryo  
412 patterning. *Development* **2015**, 142, 3996–4009.
- 413 (19) Turing, A. M. The Chemical Basis of Morphogenesis. *Philosophical Transactions of the*  
414 *Royal Society of London B: Biological Sciences* **1952**, 237, 37–72.
- 415 (20) Chirieleison, S. M.; Allen, P. B.; Simpson, Z. B.; Ellington, A. D.; Chen, X. Pattern  
416 transformation with DNA circuits. *Nature Chemistry* **2013**, 5, 1000–1005.
- 417 (21) Padirac, A.; Fujii, T.; Estévez-Torres, A.; Rondelez, Y. Spatial waves in synthetic  
418 biochemical networks. *Journal of the American Chemical Society* **2013**, 135, 14586–  
419 14592.
- 420 (22) Karzbrun, E.; Tayar, A. M.; Noireaux, V.; Bar-Ziv, R. H. Programmable on-chip DNA  
421 compartments as artificial cells. *Science* **2014**, 345, 829–832.
- 422 (23) Zenk, J.; Scalise, D.; Wang, K.; Dorsey, P.; Fern, J.; Cruz, A.; Schulman, R. Stable  
423 DNA-based reaction–diffusion patterns. *RSC Adv.* **2017**, 7, 18032–18040.
- 424 (24) Abe, K.; Kawamata, I.; Nomura, S.-i. M.; Murata, S. Programmable reactions and  
425 diffusion using DNA for pattern formation in hydrogel medium. *Mol. Syst. Des. Eng.*  
426 **2019**, –.
- 427 (25) Chen, S.; Seelig, G. Programmable patterns in a DNA-based reaction-diffusion system.  
428 *bioRxiv* **2019**,

- 429 (26) Dupin, A.; Simmel, F. C. Signalling and differentiation in emulsion-based multi-  
430 compartmentalized in vitro gene circuits. *Nature Chemistry* **2019**, *11*, 32–39.
- 431 (27) Padirac, A.; Fujii, T.; Rondelez, Y. Bottom-up construction of in vitro switchable  
432 memories. *Proceedings of the National Academy of Sciences* **2012**, *109*, E3212–E3220.
- 433 (28) Fujii, T.; Rondelez, Y. Predator - Prey molecular ecosystems. *ACS Nano* **2013**, *7*,  
434 27–34.
- 435 (29) Baccouche, A.; Montagne, K.; Padirac, A.; Fujii, T.; Rondelez, Y. Dynamic DNA-  
436 toolbox reaction circuits: A walkthrough. *Methods* **2014**, *67*, 234–249.
- 437 (30) Zadorin, A. S.; Rondelez, Y.; Galas, J.-C.; Estevez-Torres, A. Synthesis of pro-  
438 grammable reaction-diffusion fronts using DNA catalyzers. *Physical Review Letters*  
439 **2015**, *114*, 068301.
- 440 (31) Zambrano, A.; Zadorin, A. S.; Rondelez, Y.; Estévez-Torres, A.; Galas, J. C. Pursuit-  
441 and-Evasion Reaction-Diffusion Waves in Microreactors with Tailored Geometry. *The*  
442 *Journal of Physical Chemistry B* **2015**, *119*, 5349–5355.
- 443 (32) Rodjanapanyakul, T.; Takabatake, F.; Abe, K.; Kawamata, I.; Nomura, S. M.; Mu-  
444 rata, S. Diffusion modulation of DNA by toehold exchange. *Phys. Rev. E* **2018**, *97*,  
445 052617.
- 446 (33) Montagne, K.; Gines, G.; Fujii, T.; Rondelez, Y.; Fukuyama, K. Boosting functionality  
447 of synthetic DNA circuits with tailored deactivation. *Nature Communications* **2016**, *7*,  
448 13474.
- 449 (34) Tan, E.; Erwin, B.; Dames, S.; Ferguson, T.; Buechel, M.; Irvine, B.; Voelkerding, K.;  
450 Niemz, A. Specific versus nonspecific isothermal DNA amplification through ther-  
451 mophilic polymerase and nicking enzyme activities. *Biochemistry* **2008**, *47*, 9987–9999.



- 452 (35) Sant, S.; Hancock, M. J.; Donnelly, J. P.; Iyer, D.; Khademhosseini, A. Biomimetic gra-  
453 dient hydrogels for tissue engineering. *The Canadian Journal of Chemical Engineering*  
454 *88*, 899–911.
- 455 (36) Urtel, G.; Van Der Hofstadt, M.; Galas, J.-C.; Estevez-Torres, A. rEXPAR: An Isother-  
456 mal Amplification Scheme That Is Robust to Autocatalytic Parasites. *Biochemistry*  
457 **2019**, *58*, 2675–2681.
- 458 (37) Mills, D. R.; Peterson, R. L.; Spiegelman, S. An extracellular Darwinian experiment  
459 with a self-duplicating nucleic acid molecule. *Proceedings of the National Academy of*  
460 *Sciences* **1967**, *58*, 217–224.
- 461 (38) Jiang, X.; Xu, Q.; Dertinger, S. K. W.; Stroock, A. D.; Fu, T.-m.; Whitesides, G. M. A  
462 General Method for Patterning Gradients of Biomolecules on Surfaces Using Microflu-  
463 idic Networks. *Analytical Chemistry* **2005**, *77*, 2338–2347.
- 464 (39) Rehman, F. N.; Audeh, M.; Abrams, E. S.; Hammond, P. W.; Kenney, M.; Boles, T. C.  
465 Immobilization of acrylamide-modified oligonucleotides by co-polymerization. *Nucleic*  
466 *acids research* **1999**, *27*, 649–655, 9862993[pmid].
- 467 (40) Wolpert, L. Positional information and the spatial pattern of cellular differentiation.  
468 *Journal of Theoretical Biology* **1969**, *25*, 1 – 47.
- 469 (41) Cangialosi, A.; Yoon, C.; Liu, J.; Huang, Q.; Guo, J.; Nguyen, T. D.; Gracias, D. H.;  
470 Schulman, R. DNA sequence-directed shape change of photopatterned hydrogels via  
471 high-degree swelling. *Science* **2017**, *357*, 1126–1130.
- 472 (42) Merindol, R.; Delechiave, G.; Heinen, L.; Catalani, L. H.; Walther, A. Modular Design  
473 of Programmable Mechanofluorescent DNA Hydrogels. *Nature Communications* **2019**,  
474 *10*, 528.

- 475 (43) Wakamatsu, T.; Kitamura, Y.; Kotera, Y.; Nakagawa, N.; Kuramitsu, S.; Masui, R.  
476 Structure of RecJ exonuclease defines its specificity for single-stranded DNA. *J Biol*  
477 *Chem* **2010**, *285*, 9762–9.
